# Supplementary material for: In situ coupling of Co0.85Se and N-doped carbon via one-step selenization of metal–organic frameworks as a trifunctional catalyst for overall water splitting and Zn–air batteries
Source: Royal Society of Chemistry journal article supplement (doi:10.1039/c7ta01453h), 2017-01-01
Supplement: c7ta01453h1.pdf [file c7ta01453h1.pdf]

## Supporting Information

### ***In Situ* Coupling of Co<sub>0.85</sub>Se and N-Doped Carbon via One-Step Selenizing of Metal–Organic Frameworks as Trifunctional Catalysts for Overall Water Splitting and Zn–air Batteries**

*Tao Meng, Jinwen Qin, Shuguang Wang, Di Zhao, Baoguang Mao, Minhua Cao\**

Key Laboratory of Cluster Science, Ministry of Education of China, Beijing Key Laboratory of Photoelectronic/Electrophotonic Conversion Materials, School of Chemistry and Chemical Engineering, Beijing Institute of Technology, Beijing 100081, P. R. China.

\***E-mail:** caomh@bit.edu.cn

## 1. Supplementary figures

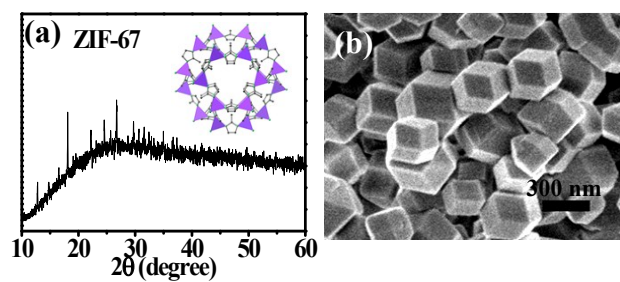

**Fig. S1** (a) XRD pattern and (b) FE-SEM image of ZIF-67.

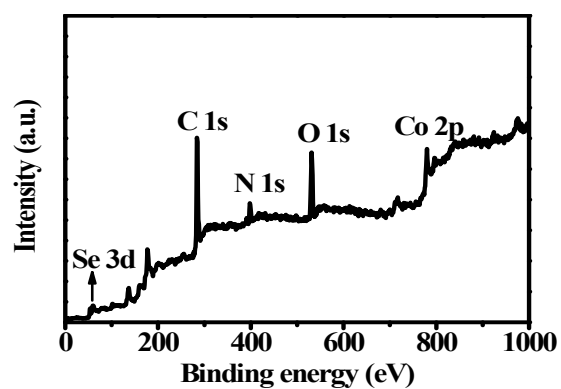

**Fig. S2** The survey XPS spectrum of  $\text{Co}_{0.85}\text{Se}@NC$ .

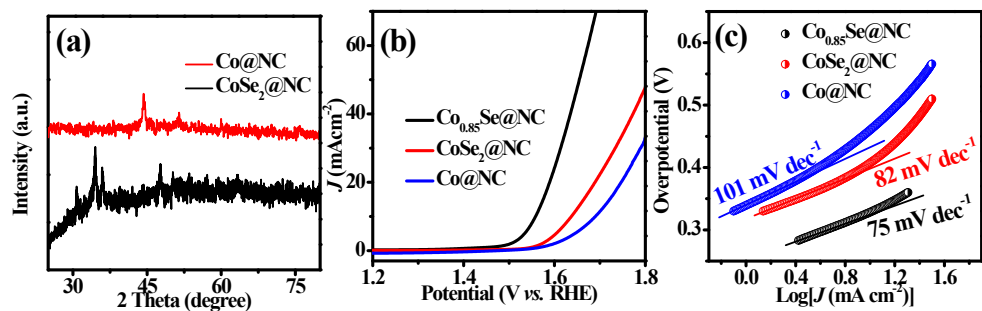

**Fig. S3** (a) XRD patterns for CoSe<sub>2</sub>@NC and Co@NC; (b) Polarization curves and (c) Tafel plots of Co<sub>0.85</sub>Se@NC, CoSe<sub>2</sub>@NC and Co@NC.

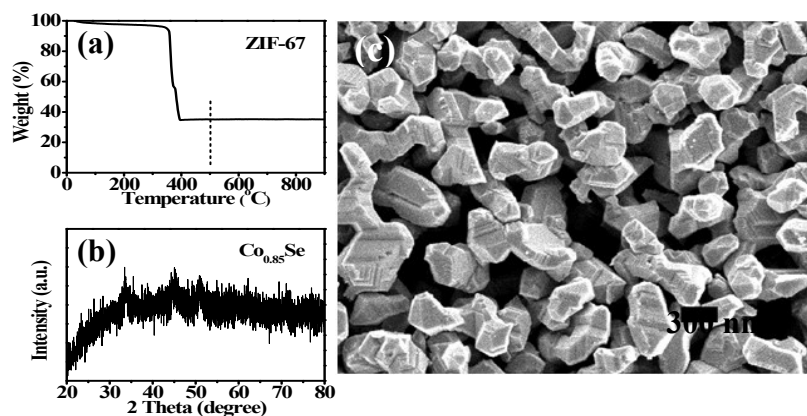

**Fig. S4** (a) The TGA curve of ZIF-67. (b) The XRD pattern and (c) FE-SEM image of Co<sub>0.85</sub>Se.

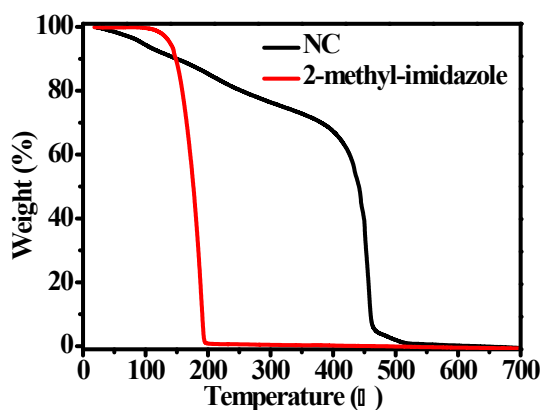

**Fig. S5** The TGA curves of NC and 2-methyl-imidazole.

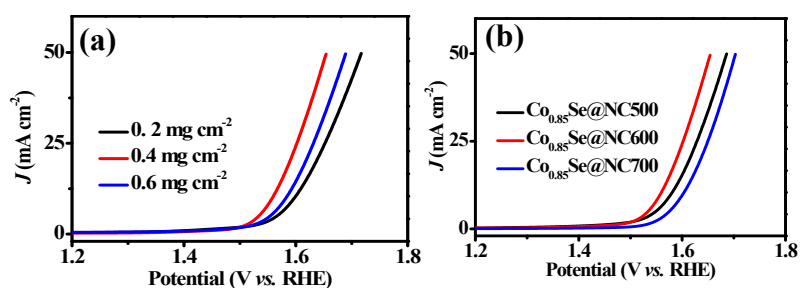

**Fig. S6 (a)** Polarization curves of  $\text{Co}_{0.85}\text{Se@NC}$  coated on glass carbon (GC) electrode with different mass rates at  $2 \text{ mV s}^{-1}$ . **(b)** Polarization curves of  $\text{Co}_{0.85}\text{Se@NC}$  prepared with different temperatures.

**Fig. S6 (b):** The  $\text{Co}_{0.85}\text{Se@NC500}$  and  $\text{Co}_{0.85}\text{Se@NC700}$  both exhibit slightly inferior oxygen evolution activity, which is probably due to either the poor crystallinity at the low temperature or the aggregation of  $\text{Co}_{0.85}\text{Se@NC}$  nanocrystallites at the high temperature.

**Table S1** Comparison of the OER activity for several recently reported highly active transition-/noble-metal and non-metal catalysts supported on different substrates.

| Catalyst                                                    | Mass loading (mg cm <sup>-2</sup> ) | Potential @ 10.0 mA cm <sup>-2</sup> (V vs. RHE) | Tafel slope (mV dec <sup>-1</sup> ) | Electrolyte    | Substrate               | Ref.             |
|-------------------------------------------------------------|-------------------------------------|--------------------------------------------------|-------------------------------------|----------------|-------------------------|------------------|
| <b>Co<sub>0.85</sub>Se@NC</b>                               | <b>0.4</b>                          | <b>1.55</b>                                      | <b>75</b>                           | <b>1 M KOH</b> | <b>Glassy carbon</b>    | <b>This work</b> |
| IrO <sub>2</sub> /C                                         | 0.2                                 | 1.60                                             | N.A.                                | 0.1 M KOH      | Glassy carbon           | 1                |
| Pt/C                                                        | ~0.25                               | 1.83                                             | 169                                 | 0.1 M KOH      | Glassy carbon           | 2                |
| CoSe <sub>2</sub> ultrathin nanosheets                      | 0.142                               | 1.55                                             | 44                                  | 0.1 M KOH      | Glassy carbon           | 3                |
| CoSe <sub>2</sub> /N-graphene                               | ~0.2                                | 1.596                                            | ~40                                 | 0.1 M KOH      | Glassy carbon           | 4                |
| Mn <sub>3</sub> O <sub>4</sub> /CoSe <sub>2</sub> hybrids   | ~0.2                                | 1.68                                             | 49                                  | 0.1 M KOH      | Glassy carbon           | 5                |
| CoS <sub>2</sub> /N <sub>3</sub> S-GO                       | 0.25                                | 1.61                                             | 75                                  | 0.1 M KOH      | Glassy carbon           | 6                |
| Co <sub>3</sub> O <sub>4</sub> /N-graphene                  | 1                                   | 1.54                                             | 67                                  | 1 M KOH        | Ni foam                 | 7                |
| Co <sub>3</sub> O <sub>4</sub> C-NA                         | ~0.2                                | 1.52                                             | 70                                  | 0.1 M KOH      | Cu foil                 | 8                |
| TCCN                                                        | ~1.4                                | 1.65                                             | 74.6                                | 0.1 M KOH      | self-supported membrane | 9                |
| CoP                                                         | 6.2                                 | 1.52                                             | 65                                  | 1 M KOH        | Ni foam                 | 10               |
| Zn <sub>x</sub> Co <sub>3-x</sub> O <sub>4</sub> nanoarrays | ~1                                  | 1.55                                             | 51                                  | 1 M KOH        | Ti foil                 | 11               |
| Ni <sub>x</sub> Co <sub>3-x</sub> O <sub>4</sub> nanoarrays | N.A.                                | ~1.6                                             | 59-64                               | 1 M NaOH       | Ti foil                 | 12               |

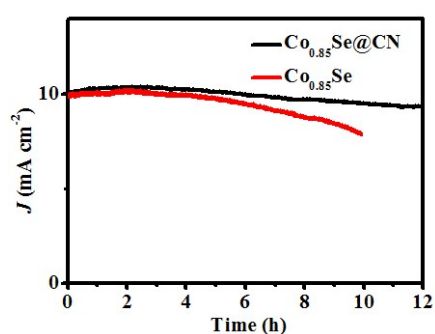

**Fig. S7** Chronoamperometric responses at a constant potential (the potential at 10 mA cm<sup>-2</sup>) of Co<sub>0.85</sub>Se@NC and Co<sub>0.85</sub>Se.

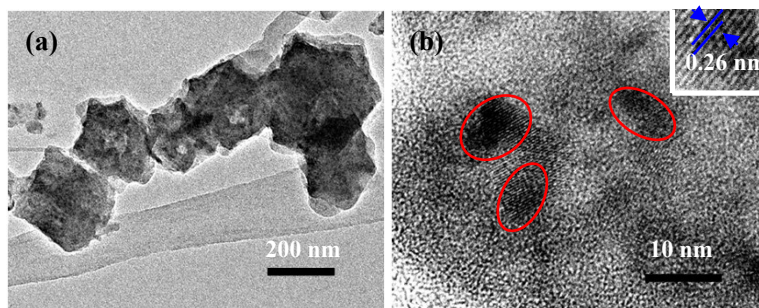

**Fig. S8** (a) TEM image and (b) HRTEM image of  $\text{Co}_{0.85}\text{Se}@NC$  after 12 h reaction.

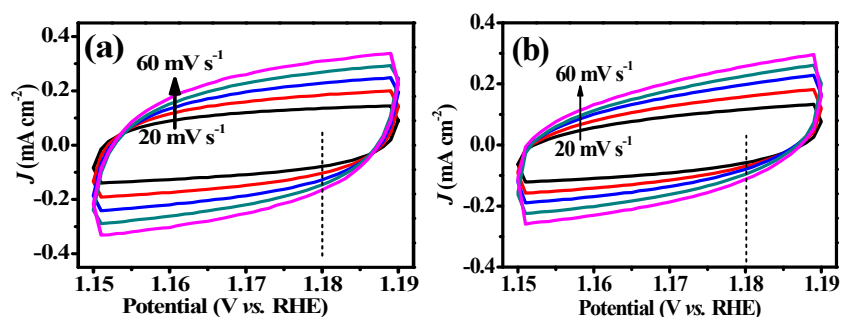

**Fig. S9** CVs tested at the potential range of 1.15 –1.19 V vs. RHE with the scan rates increasing from 20 to 60  $\text{mV s}^{-1}$  for  $\text{Co}_{0.85}\text{Se}@NC$  (a) and  $\text{Co}_{0.85}\text{Se}$  (b).

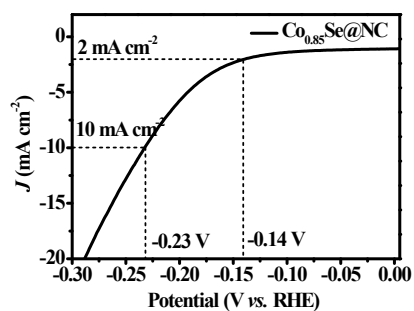

**Fig. S10** Polarization curve of  $\text{Co}_{0.85}\text{Se}@NC$  for HER ( $\text{N}_2$ -saturated 1.0 M KOH solution with a scan rate of 2  $\text{mV s}^{-1}$ ).

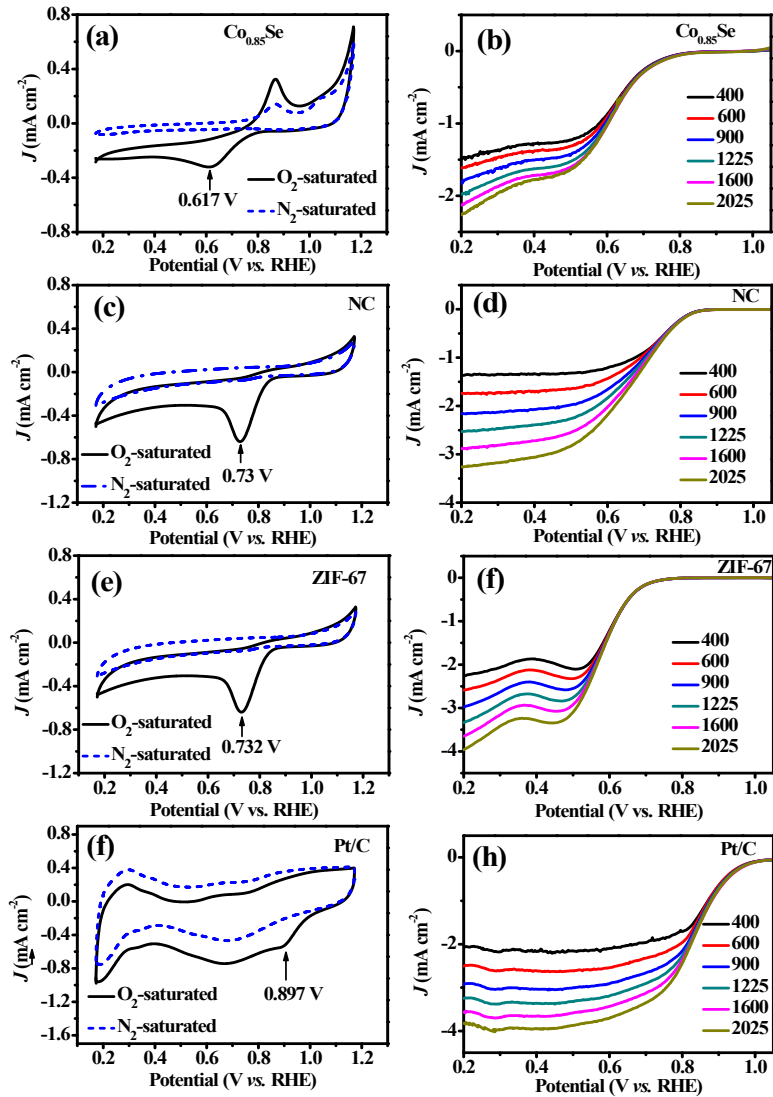

**Fig. S11** The CVs in 0.1 M KOH solution and polarization curves in O<sub>2</sub>-saturated 0.1 M KOH solution with rotating speeds from 400 to 2025 rpm for Co<sub>0.85</sub>Se (a,b), NC (c,d), ZIF-67(e,f) and Pt/C (g,h).

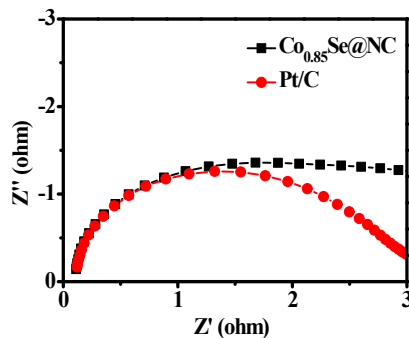

**Fig. S12** The EIS of Co<sub>0.85</sub>Se@NC and commercial Pt/C at open-circuit voltage for Zn-air battery.

**Table S2** Comparison of the primary Zn–air batteries with several key parameters for several recently reported highly active transition–/noble–metal and non–metal catalysts.

| ORR catalyst used                                                       | Zn electrode/electrolyte | Current density @ $V = 1.0$ V (mA cm <sup>-2</sup> ) | Peak power density (mW cm <sup>-2</sup> ) | Ref.             |
|-------------------------------------------------------------------------|--------------------------|------------------------------------------------------|-------------------------------------------|------------------|
| <b>Co<sub>0.85</sub>Se@NC</b>                                           | <b>Zn foil/6M KOH</b>    | <b>186</b>                                           | <b>268</b>                                | <b>This work</b> |
| CoO/N–CNT                                                               | Zn foil/6 M KOH          | 197                                                  | 265                                       | 13               |
| Co@NG–acid                                                              | Zn foil/6 M KOH          | 255                                                  | 350                                       | 14               |
| Co <sub>3</sub> O <sub>4</sub> nanoparticles decorated carbon nanofiber | Zn plate/6 M KOH         | 81                                                   | 125                                       | 15               |
| Fe, Co and N precursors pyrolyzed with carbon                           | Zn plate/6 M KOH         | 150                                                  | 232                                       | 16               |
| Graphene supported Mn <sub>3</sub> O <sub>4</sub> nanoparticles         | Zn power/(N.A.M) KOH     | 70                                                   | 120                                       | 17               |
| Ketjenblack carbon supported amorphous MnO <sub>x</sub>                 | Zn power/(6 M) KOH       | 120                                                  | 190                                       | 18               |
| Fe@N–C–700                                                              | Zn plate/6 M KOH         | 157                                                  | 220                                       | 19               |
| FeCu@GC                                                                 | Zn plate/6 M KOH         | 100                                                  | 212                                       | 20               |
| Nanoporous carbon fiber films–1000                                      | Zn plate/6 M KOH         | ~150                                                 | 185                                       | 21               |
| N–doped carbon nanotubes                                                | Zn plate/6 M KOH         | 50                                                   | 75                                        | 22               |
| N,P–doped carbon foam                                                   | Zn plate/6 M KOH         | <70                                                  | 55                                        | 23               |



**Table S3** Comparison of the rechargeable Zn–air batteries with several key parameters for several recently reported highly active transition–/noble–metal and non–metal catalysts.

| Air catalyst used                                                        | Cycling conditions and stability                                                                                                                | Voltage polarization<br>V (@ <i>j</i> , mA cm <sup>-2</sup> ) | Ref.             |
|--------------------------------------------------------------------------|-------------------------------------------------------------------------------------------------------------------------------------------------|---------------------------------------------------------------|------------------|
| <b>Co<sub>0.85</sub>Se@NC</b>                                            | <b>10 mA cm<sup>-2</sup>, 600 s per cycle periods for 180 cycles: polarization increased ~0.16 V at the end</b>                                 | <b>0.8 (10)</b>                                               | <b>This work</b> |
| MnO <sub>2</sub> nanotube and carbon nanotube composite                  | ~8 mA cm <sup>-2</sup> , 600 s per cycle periods for 50 cycles: polarization increased ~0.4 V at the end                                        | 1.5 (20)                                                      | 24               |
| Co <sub>3</sub> O <sub>4</sub> nanoparticles decorated carbon nanofibers | 2 and 20 mA cm <sup>-2</sup> , 1 h per cycle periods for 160 and 55 cycles: polarization increased 0.09 V at the end for 20 mA cm <sup>-2</sup> | 0.7 (2)<br>0.85 (20)                                          | 15               |
| Tri-electrode: CoO/N–CNT + NiFe LDH                                      | 20-50 mA cm <sup>-2</sup> , 4-20 h per cycle period for >200 h: negligible voltage change at the end                                            | 0.7 (20)                                                      | 13               |
| Co <sub>3</sub> O <sub>4</sub> NP modified MnO <sub>2</sub> nanotubes    | 15 mA cm <sup>-2</sup> ; 14 min per cycle period for 60 cycles; voltage gap increased ~0.3-0.4 V at the end                                     | ~0.85 (15)                                                    | 25               |
| ZnCo <sub>2</sub> O <sub>4</sub> /N–CNT                                  | 10-100 mA cm <sup>-2</sup> , 20 min per cycle for 17 cycles (340 min); negligible voltage change at the end                                     | 0.84(10-100)                                                  | 26               |
| TCCN                                                                     | 20 mA cm <sup>-2</sup> , 10 min per cycle for 15 cycles; negligible voltage change at the end                                                   | 1.68 (20)                                                     | 9                |

## 2. Supplementary video

**Video S.** Co<sub>0.85</sub>Se@NC coated on nickel foam was used as the working electrode for overall water splitting at the current density of 10 mA cm<sup>-2</sup>. This video instinctively reflects the generation rate of O<sub>2</sub> or H<sub>2</sub> gas with the Co<sub>0.85</sub>Se@NC catalyst during the overall water splitting, indicating its excellent overall water splitting performance.

### 3. References

- 1 Y. Zhao, R. Nakamura, K. Kamiya, S. Nakanishi and K. Hashimoto, *Nat. Commun.*, 2013, **4**, 2390—2396.
- 2 X. Lv, Y. Zhu, H. Jiang, X. Yang, Y. Liu, Y. Su, J. Huang, Y. Yao and C. Li, *Dalton Transactions*, 2015, **44**, 4148—4154.
- 3 Y. Liu, H. Cheng, M. Lyu, S. Fan, Q. Liu, W. Zhang, Y. Zhi, C. Wang, C. Xiao and S. Wei, *J. Am. Chem. Soc.*, 2014, **136**, 15670—15675.
- 4 M. R. Gao, X. Cao, Q. Gao, Y. F. Xu, Y. R. Zheng, J. Jiang and S. H. Yu, *ACS nano*, 2014, **8**, 3970—3978.
- 5 M. R. Gao, Y. F. Xu, J. Jiang, Y. R. Zheng and S. H. Yu, *J. Am. Chem. Soc.*, 2012, **134**, 2930—2933.
- 6 P. Ganesan, M. Prabu, J. Sanetuntikul and S. Shanmugam, *ACS Catalysis*, 2015, **5**, 3625—3637.
- 7 Y. Liang, Y. Li, H. Wang, J. Zhou, J. Wang, T. Regier, H. Dai, *Nat. Mater.*, 2011, **10**, 780—786.
- 8 T. Y. Ma, S. Dai, M. Jaroniec and S. Z. Qiao, *J. Am. Chem. Soc.*, 2014, **136**, 13925—13931.
- 9 T. Y. Ma, J. L. Cao, M. Jaroniec and S. Z. Qiao, *Angew. Chem. Int. Ed.*, 2016, **55**, 1138—1142.
- 10 Y. P. Zhu, Y. P. Liu, T. Z. Ren and Z. Y. Yuan, *Adv. Funct. Mater.*, 2015, **25**, 7337—7347.
- 11 X. Liu, Z. Chang, L. Luo, T. Xu, X. Lei, J. Liu, X. Sun, *Chem. Mater.*, 2014, **26**, 1889—1895.
- 12 Y. Li, P. Hasin, Y. Wu, *Adv. Mater.*, 2010, **22**, 1926—1929.
- 13 Y. G. Li, M. Gong, Y. Y. Liang, J. Feng, J. E. Kim, H. L. Wang, G. S. Hong, B. Zhang and H. J. Dai, *Nat. Commun.*, 2013, **4**, 1805—1811.
- 14 M. Zeng, Y. Liu, F. Zhao, K. Nie, N. Han, X. Wang, W. Huang, X. Song, J. Zhong and Y. Li, *Adv. Funct. Mater.*, 2016, **26**, 4397—4404.
- 15 B. Li, X. Ge, F. T. Goh, T. A. Hor, D. Geng, G. Du, Z. Liu, J. Zhang, X. Liu and Y. Zong, *Nanoscale*, 2015, **7**, 1830—1838.

16. Z. Chen, J. Y. Choi, H. Wang, H. Li and Z. Chen, *J. Power Sources*, 2011, **196**, 3673—3677.
17. J. S. Lee, T. Lee, H. K. Song, J. Cho, B. S. Kim, *Energy Environ. Sci.*, 2011, **4**, 4148—4154.
18. J. S. Lee, G. S. Park, H. I. Lee, S. T. Kim, R. Cao, M. Liu and J. Cho, *Nano Lett.*, 2011, **11**, 5362—5366.
19. J. Wang, H. Wu, D. Gao, S. Miao, G. Wang and X. Bao, *Nano Energy*, 2015, **13**, 387—396.
20. G. Nam, J. Park, M. Choi, P. Oh, S. Park, M. G. Kim, N. Park, J. Cho and J. S. Lee, *ACS nano*, 2015, **9**, 6493—6501.
21. Q. Liu, Y. B. Wang, L. M. Dai and J. N. Yao, *Adv. Mater.*, 2016, **28**, 3000—3006.
22. S. Zhu, Z. Chen, B. Li, D. Higgins, H. Wang, H. Li and Z. Chen, *Electrochim. Acta*, 2011, **56**, 5080—5084.
23. J. Zhang, Z. Zhao, Z. Xia and L. Dai, *Nat. Nanotech.*, 2015, **10**, 444—452.
24. Z. Chen, A. Yu, R. Ahmed, H. Wang, H. Li and Z. Chen, *Electrochim. Acta*, 2012, **69**, 295—300.
25. G. Du, X. Liu, Y. Zong, T. A. Hor, A. Yu, Z. Liu, *Nanoscale*, 2013, **5**, 4657—4661.
26. Z. Q. Liu, H. Cheng, N. Li, T. Y. Ma and Y. Z. Su, *Adv. Mater.*, 2016, **28**, 3777—3784.
